# Supplementary material
Source: PubMed Central journal article supplement (PMC1326239)
Supplement: nar_34_1_104__1.pdf [file nar_34_1_104__1.pdf]

**SUPPLEMENTARY INFORMATION**

**Table S1:** Non-redundant list of selected sequences. Sequences marked by \*\* were deleted from the all analyses because they contained additional TATA boxes. Sequences marked by \* are those that were further deleted initially, for the same reasons, but that their deletion did not change the observed pattern (see the main text for details).

a. MLP sequences selected by thermodynamic criteria

|            |             |          |            |
|------------|-------------|----------|------------|
| MLP t1     | TGCCCTTGTT  | TATAAAAG | GTTTAAAAG  |
| MLP t2     | CCTGGGATAT  | TATAAAAG | GGCTATTCGC |
| MLP t3     | GCTACATG    | TATAAAAG | GTTTTCTTT  |
| MLP t5     | AAAGAGCTTG  | TATAAAAG | TTGACGTGGG |
| MLP t6     | AACCGCTTTC  | TATAAAAG | TCGGGAAATT |
| MLP t7     | GTAAGCGGGC  | TATAAAAG | ATTCTAGCTT |
| MLP t8     | GAGCGTGATC  | TATAAAAG | CCAGAACACC |
| MLP t10    | CCATTATTTG  | TATAAAAG | GTACCGTCGG |
| MLP t11    | GTATAATCGT  | TATAAAAG | TGTAGGTCTT |
| MLP t12    | ATCGGAATGA  | TATAAAAG | AGGTGATCTA |
| MLP t13    | TAATTCTGAG  | TATAAAAG | CTGGCGATAA |
| MLP t14    | GGTGGCGTT   | TATAAAAG | TCTTAAACTT |
| MLP t16    | TGGCAAACAA  | TATAAAAG | CGTGACGAGG |
| MLP t17    | GCACCTTCGG  | TATAAAAG | CACGGGAGTA |
| MLP t18    | GTGCAATCTG  | TATAAAAG | CGTAAATTTA |
| MLP t19    | AGAATCTCCG  | TATAAAAG | CAGTTGATCC |
| MLP t21    | CGTACCTTGA  | TATAAAAG | ACTAATTAAG |
| MLP t22 ** | TCGTGGTTTA  | TATAAAAG | ATGGGCTCGA |
| MLP t23 ** | ACGTCCTCGT  | TATAAAAG | TATATATGGA |
| MLP t29 ** | GGAGACACTA  | TATAAAAG | ATTGGGGGCT |
| MLP t32    | GGCGGTATAC  | TATAAAAG | TTAGTGTTGT |
| MLP t33    | AGATTTGGCG  | TATAAAAG | CGCGAATGGC |
| MLP t34    | TGCTTGCGGG  | TATAAAAG | GCTCGTATAC |
| MLP t37    | TTTAGACTT   | TATAAAAG | GAAAGCGCGC |
| MLP t38    | TGATGGGCCT  | TATAAAAG | CCTTTTAAGC |
| MLP t39    | GTCAGTAGGT  | TATAAAAG | GTATACGTCT |
| MLP t40 ** | AAGTCTACTA  | TATAAAAG | GAGATAGGGC |
| MLP t42    | GTCTAAATAC  | TATAAAAG | CTGTCCCAGT |
| MLP t51    | ATCACTATCA  | TATAAAAG | GCATAAGATT |
| MLP t52    | TGTGTAAC TG | TATAAAAG | TCGGCTTGTT |
| MLP t53    | GTCTGTGGTT  | TATAAAAG | TAATTACCAA |
| MLP t5     | TAAAGCCTGT  | TATAAAAG | TAACCCTTGC |
| MLP t55    | GTGGTGGATG  | TATAAAAG | GCGATTGAGT |
| MLP t56    | GCGTGGCCAG  | TATAAAAG | AGCCGAACAC |
| MLP t58    | AGGGTGAAGG  | TATAAAAG | GTTAGCAA   |
| MLP t59 ** | TGGCAACTTT  | TATAAAAG | TGGAGAACTC |
| MLP t63    | AAAGGAGAGA  | TATAAAAG | GGCGGGGAAT |
| MLP t65    | CTTGTTTCGA  | TATAAAAG | GCGACGGTAA |
| MLP t67    | AGCTTCAAGT  | TATAAAAG | CCTGGTGCGC |
| MLP t68    | GTACCCAGGT  | TATAAAAG | TCGCTAGACT |
| MLP t69    | TTCAAAGGTC  | TATAAAAG | CGGAATTGGT |
| MLP t70    | ATAGTTTAAT  | TATAAAAG | GTCCCTTCAC |
| MLP t71    | GATGGGGAGG  | TATAAAAG | TGGGATAAGG |

|         |            |           |            |
|---------|------------|-----------|------------|
| MLP t72 | CAGGTTTATC | TATAAAAAG | GTTGGGGAAC |
| MLP t73 | AGGGCAAGAA | TATAAAAAG | TGTTGGCGAG |
| MLP t74 | TAGCGATGCG | TATAAAAAG | GCTTCGTAAT |
| MLP t66 | ATGAGTAACA | TATAAAAAG | GGAAGTAGTG |

b. MLP sequences selected by kinetic criteria

|            |             |           |             |
|------------|-------------|-----------|-------------|
| MLP k1     | GGCCTCGGTG  | TATAAAAAG | ACTAGCACAA  |
| MLP k4     | TACATGTACT  | TATAAAAAG | GTTATATGT   |
| MLP k9 **  | TCAGACTCT   | TATAAAAAG | TAGATTTCTG  |
| MLP k15    | ATTGATAGCG  | TATAAAAAG | GCTAGCGGTT  |
| MLP k20    | CAGCGAATGC  | TATAAAAAG | GTCTTGCTGC  |
| MLP k21    | GGTTGGACCC  | TATAAAAAG | TACCCTGAAT  |
| MLP k22    | GTCTGATTGA  | TATAAAAAG | TTCGAGATGC  |
| MLP k23    | TCATGGTGGA  | TATAAAAAG | CTAGGAACGC  |
| MLP k27    | TCGTGCTTGG  | TATAAAAAG | TCACTGCTCG  |
| MLP k30    | TAGAATGGGA  | TATAAAAAG | CTCGGGTGAA  |
| MLP k36    | ATGTTGTACG  | TATAAAAAG | GATAGTGATA  |
| MLP k40    | GATAATGCGA  | TATAAAAAG | GAGATGGGGG  |
| MLP k17    | AGCATTAAGT  | TATAAAAAG | GCGGGTTGTC  |
| MLP k51    | TTGTTTGCGT  | TATAAAAAG | AACACAGGTG  |
| MLP k52    | CGGTTGACGG  | TATAAAAAG | TGCCTAGCCC  |
| MLP k54    | GTTCGCCTCA  | TATAAAAAG | TGGTGTGTTGG |
| MLP k55    | ATACGACGAG  | TATAAAAAG | CGGGCCGGGC  |
| MLP k57    | ATCGTTCGTT  | TATAAAAAG | TTAGTCGTAG  |
| MLP k60    | TGTGTCATCA  | TATAAAAAG | TTTTAATTTT  |
| MLP k61    | TTTTACGCGC  | TATAAAAAG | GTTGGTAGTA  |
| MLP k62    | TAAGTTGGCG  | TATAAAAAG | CGCGCGTAAA  |
| MLP k63    | GGGGCGTGTT  | TATAAAAAG | GGGATGTGTG  |
| MLP k64    | GATGCTGGGG  | TATAAAAAG | GTCGGGTACA  |
| MLP k66    | GGTGGGTCTC  | TATAAAAAG | CCTGGGGTGT  |
| MLP k67    | CAGATTGGCC  | TATAAAAAG | TACCTCGGGC  |
| MLP k68    | TTCATGCTGG  | TATAAAAAG | AGTGGTATTC  |
| MLP k70 ** | TGTTTGTTT   | TATAAAAAG | GGAAAGCTAT  |
| MLP k76    | AGTGGTAGG   | TATAAAAAG | TTTAGGGGTG  |
| MLP k77    | AGCATTCGAT  | TATAAAAAG | TTACGCACAG  |
| MLP k80    | CGGTTTGGGA  | TATAAAAAG | CTTGCTACTT  |
| MLP k82    | CCCCGTTCCA  | TATAAAAAG | TAAGACTAGT  |
| MLP k83    | GAGTTTGGCG  | TATAAAAAG | TGTAGGGCCG  |
| MLP k84    | TATCGTGGGG  | TATAAAAAG | GTGCCTGAGC  |
| MLP k85    | TATTCCATCA  | TATAAAAAG | CGGAGGCTCT  |
| MLP k87    | CCGGTTGATC  | TATAAAAAG | TTTTAGGTGG  |
| MLP k88    | GATATTCGTC  | TATAAAAAG | GGCGTGAGGC  |
| MLP k93    | TTGACCTCGG  | TATAAAAAG | GGCGCTGGCC  |
| MLP k94    | TCCATTGAAA  | TATAAAAAG | ATAGATCTTA  |
| MLP k95    | TGTACAGTAA  | TATAAAAAG | TTGCGATTGT  |
| MLP k96    | GTTATAACAAG | TATAAAAAG | TCAGCGGAGG  |
| MLP k97    | CTGATTTGCA  | TATAAAAAG | CGGGCTCATT  |
| MLP k98    | CAAGTGGGCT  | TATAAAAAG | GTAAGTATGC  |
| MLP k99 ** | CAACGCCATA  | TATAAAAAG | AGGACTTCGA  |

c. E4 sequences selected by thermodynamic criteria

|           |             |          |             |
|-----------|-------------|----------|-------------|
| E4 t1     | ACTTCGGCAG  | TATATATA | GCGTCGTAAG  |
| E4 t3     | ACCGGGAGGT  | TATATATA | CTGCCACGCA  |
| E4 t4     | GCTGGATCCG  | TATATATA | GCGGGATGCA  |
| E4 t6     | CCCTGCGTGA  | TATATATA | TCGGACGCTC  |
| E4 t8     | CGCACCCAAA  | TATATATA | AGTAACTCAT  |
| E4 t10    | GAAACCAGGG  | TATATATA | GCAGGGTTGG  |
| E4 t11    | CGGCTCAGCC  | TATATATA | GCACAATGCG  |
| E4 t13    | CGGGACATGA  | TATATATA | GGTATTTGAC  |
| E4 t14    | GGGGTCAGAG  | TATATATA | ACTCGGGATG  |
| E4 t15    | GACGTCCACA  | TATATATA | CATCGAACTC  |
| E4 t16    | CGTGTGCCGT  | TATATATA | GCGGTTCCCTA |
| E4 t17    | GGCGGTAACC  | TATATATA | ACCCGTGCCT  |
| E4 t20 ** | TGCTAACGTT  | TATATATA | ACGGATCGAC  |
| E4 t21 *  | TGGGGTAGGG  | TATATATA | ATTGTGATAA  |
| E4 t24    | ACCCTGTTCC  | TATATATA | TTTGTCCCTG  |
| E4 t26    | TGCGGGATCC  | TATATATA | GGGCTATTCG  |
| E4 t27    | TGTCAACACG  | TATATATA | ACTCCCTAA   |
| E4 t28    | CAAGTGCCGG  | TATATATA | GCGGCGTTTT  |
| E4 t29    | AGGTGCGGGA  | TATATATA | CAAACCTACAG |
| E4 t31 *  | ACGCCGTTAG  | TATATATA | ATGTCCAATA  |
| E4 t32 ** | GAGCGCACCC  | TATATATA | TACCGTCGCG  |
| E4 t39    | CCTGCCTGTG  | TATATATA | ACGGACACTT  |
| E4 t42    | AACCCCAATC  | TATATATA | CCAGAAAACC  |
| E4 t45    | GGGGCAAGCC  | TATATATA | GGGTGGTTGG  |
| E4 t51    | CGTGCTCCGG  | TATATATA | ACCGCCAATG  |
| E4 t52    | TCGCCGCCCTG | TATATATA | ACGGACGCAG  |
| E4 t53    | AGGGGCAGAC  | TATATATA | TCTGATCTCC  |
| E4 t58    | GCGCCGACTG  | TATATATA | GACCAGACCT  |
| E4 t60    | TATATCACGC  | TATATATA | CCCGAACCCAG |
| E4 t61 ** | ACGCCCGCAC  | TATATATA | AACATACAAT  |
| E4 t62    | ACCGCCAACT  | TATATATA | CTGCTTGATG  |
| E4 t64    | TCCGCCAACC  | TATATATA | CCAGATGCTT  |
| E4 t65 ** | CGCGGCCGTA  | TATATATA | TATGCACG    |
| E4 t66    | TGTGACAACA  | TATATATA | GTCGAACAAC  |
| E4 t67 *  | AGGTGCGTAT  | TATATATA | ATTGAGAGCG  |
| E4 t68 *  | AACTTCACAT  | TATATATA | ATCCGCTCC   |
| E4 t69    | CTAGCCAAGG  | TATATATA | CCTCATCTCC  |
| E4 t70 *  | TAGCTCAACA  | TATATATA | ATATCTTCAA  |
| E4 t72    | TACGTTAGCA  | TATATATA | GGTGCAGCCT  |
| E4 t73    | CGACGCAGCG  | TATATATA | CCCATGCGAC  |
| E4 t74    | TGAGGGAGGG  | TATATATA | GGCCGTTGGC  |
| E4 t81 *  | CGTGGTAGAT  | TATATATA | ACGGGGAGTA  |
| E4 t82    | ACCCACTCCC  | TATATATA | CCACCAGAGC  |
| E4 T83    | TACATCTTCT  | TATATATA | TCTATTAGAC  |
| E4 t85    | GCAGAGCCAG  | TATATATA | ACGCACGTGC  |
| E4 t87    | GCGCTGCCCT  | TATATATA | CGCCATCAGC  |
| E4 t91    | CGCCACCCCA  | TATATATA | CAAGCCCACC  |
| E4 t92    | CCGGTCTACT  | TATATATA | CAATGCATGC  |
| E4 t95    | GATGTAAATG  | TATATATA | ACGAGGAAGA  |

|        |            |          |            |
|--------|------------|----------|------------|
| E4 t97 | CACCCCACAG | TATATATA | TGGGCCCCAA |
| E4 t98 | GGTGGGAACG | TATATATA | ATGTGGATGG |

d. E4 sequences selected by kinetic criteria

|           |            |          |             |
|-----------|------------|----------|-------------|
| E4 k2 *   | AGAACATAAT | TATATATA | GGTTGGGGG   |
| E4 k4     | GTCTCGCGC  | TATATATA | GTGCCGTGGG  |
| E4 k5 **  | CAGGTCGGTT | TATATATA | TGGGGGGGC   |
| E4 k7     | GGTGCGGCGT | TATATATA | AGTGGGGGTT  |
| E4 k8     | CGCAGGGTGA | TATATATA | GGCGCGACCA  |
| E4 k9     | GGCGTAGAAC | TATATATA | TGAATGCCGC  |
| E4 k11    | TAAGGCCCGT | TATATATA | CAGGGCGTTC  |
| E4 k13    | AATGGGGCGG | TATATATA | CGCGGCGGGA  |
| E4 k15    | CCTCCCCCGC | TATATATA | TGGCGGCTAA  |
| E4 k17 ** | CCGTTGCTTT | TATATATA | GTGCGCCAGG  |
| E4 k18    | CCGACGTTG  | TATATATA | AGGGGGCTTA  |
| E4 k19    | TTCTGTGGTG | TATATATA | GAGGGGTCAT  |
| E4 k20 *  | GTATCCGTTT | TATATATA | ATCCGGCGGG  |
| E4 k21    | GCGGGTGACG | TATATATA | GTGGGGAGC   |
| E4 k27    | TAGTGGCTGC | TATATATA | CGCCCCCAGC  |
| E4 k28    | TCGCTCCTAG | TATATATA | CTGAGTGGAG  |
| E4 k30    | GCACTAGCGC | TATATATA | TGGTCTGGGG  |
| E4 k31    | AATCCACCGC | TATATATA | CACGACACGT  |
| E4 k32    | GCGTTTTGCC | TATATATA | GGGGTACGGT  |
| E4 k33    | CCCATCCAGC | TATATATA | CTGATCCCCC  |
| E4 k34    | AGCTTGGGTG | TATATATA | GTTGCGGGCC  |
| E4 k36    | CTGCTGGTGC | TATATATA | GA CTGGCGGG |
| E4 k38    | GTCTAGTAAG | TATATATA | AGCAGGCCTC  |
| E4 k51    | AACTCCAGCC | TATATATA | TGCGGCTACA  |
| E4 k52    | TCCATTCGAC | TATATATA | CGCCGGTCAA  |
| E4 k53    | CGCTTGAACC | TATATATA | CGCAGCCCAT  |
| E4 k55    | TTTAGGAAGC | TATATATA | CACCCCAACG  |
| E4 k56    | TCTTGGGTCT | TATATATA | GGGCGTTCTG  |
| E4 k58    | CAGGTAGGGC | TATATATA | CAAAGGGGGG  |
| E4 k59    | GAGGTTTAGG | TATATATA | TTGACGCACT  |
| E4 k60    | TCGATTGGGG | TATATATA | GTGTGGCAAG  |
| E4 k61    | CTAGCCCCGG | TATATATA | CAGCGCCGCC  |
| E4 k63    | CGAAAGAGTC | TATATATA | CGCGGGGTGT  |
| E4 k64    | AGGGCGTGTC | TATATATA | AGAGGGACGT  |
| E4 k67    | CGGAGGTCGA | TATATATA | CGCCGTGTGA  |
| E4 k68    | GGGCAGAAGC | TATATATA | CACTTGTGGC  |
| E4 k71    | GGAAGGTCGT | TATATATA | TCCGGCCGGC  |
| E4 k74    | TCGTTCTTGT | TATATATA | GTGGCGACCG  |
| E4 k76    | GGTTAAGTGC | TATATATA | CACGCGTGTC  |
| E4 k78    | GTACCAGGTG | TATATATA | CGCGATGGGG  |
| E4 k80 *  | TTGCGCTCGC | TATATATA | ATGCCTGGGA  |
| E4 k82    | GCGTACAGGC | TATATATA | CAGCGCTGTA  |
